# Supplementary material for: Nasal Immunization with the C-Terminal Domain of Bcla3 Induced Specific IgG Production and Attenuated Disease Symptoms in Mice Infected with Clostridioides difficile Spores
Source: PubMed Central journal article supplement (PMC7555657; doi:10.3390/ijms21186696), 2020-09-13
Supplement: ijms-21-06696-s001.pdf [file ijms-21-06696-s001.pdf]

**Table S1.** Highly immunogenic peptides for MHC-I molecules on the C-terminal domain of BclA3.

| <b>Allele <sup>a</sup></b> | <b>Start <sup>b</sup></b> | <b>End <sup>b</sup></b> | <b>Percentile Rank <sup>c</sup></b> |
|----------------------------|---------------------------|-------------------------|-------------------------------------|
| HLA-B*44:03                | 646                       | 654                     | 0.11                                |
| HLA-A*26:01                | 571                       | 579                     | 0.12                                |
| HLA-A*68:01                | 561                       | 569                     | 0.12                                |
| HLA-A*26:01                | 591                       | 600                     | 0.12                                |
| HLA-B*15:01                | 600                       | 609                     | 0.13                                |
| HLA-B*51:01                | 567                       | 576                     | 0.14                                |
| HLA-B*07:02                | 567                       | 576                     | 0.17                                |
| HLA-A*33:01                | 561                       | 569                     | 0.18                                |
| HLA-B*07:02                | 511                       | 519                     | 0.2                                 |
| HLA-A*68:02                | 609                       | 617                     | 0.2                                 |
| HLA-A*26:01                | 662                       | 670                     | 0.21                                |
| HLA-A*68:01                | 560                       | 569                     | 0.21                                |
| HLA-A*11:01                | 560                       | 569                     | 0.22                                |
| HLA-A*68:01                | 641                       | 649                     | 0.23                                |
| HLA-A*68:02                | 666                       | 675                     | 0.27                                |
| HLA-B*07:02                | 604                       | 612                     | 0.3                                 |
| HLA-A*30:02                | 591                       | 600                     | 0.3                                 |
| HLA-A*31:01                | 560                       | 569                     | 0.33                                |
| HLA-A*02:03                | 527                       | 535                     | 0.33                                |
| HLA-A*02:06                | 580                       | 589                     | 0.34                                |
| HLA-A*01:01                | 591                       | 600                     | 0.35                                |
| HLA-B*53:01                | 567                       | 576                     | 0.35                                |
| HLA-A*02:03                | 618                       | 626                     | 0.38                                |
| HLA-A*30:02                | 571                       | 579                     | 0.38                                |
| HLA-A*02:01                | 650                       | 658                     | 0.4                                 |
| HLA-B*07:02                | 108                       | 116                     | 0.4                                 |
| HLA-B*44:03                | 646                       | 655                     | 0.41                                |
| HLA-B*44:02                | 646                       | 654                     | 0.42                                |
| HLA-A*02:03                | 656                       | 664                     | 0.43                                |
| HLA-B*40:01                | 646                       | 654                     | 0.46                                |
| HLA-A*26:01                | 591                       | 599                     | 0.47                                |
| HLA-A*30:02                | 662                       | 670                     | 0.47                                |
| HLA-B*53:01                | 513                       | 521                     | 0.5                                 |
| HLA-B*15:01                | 662                       | 670                     | 0.5                                 |
| HLA-A*68:02                | 581                       | 589                     | 0.5                                 |
| HLA-A*68:02                | 591                       | 599                     | 0.5                                 |
| HLA-B*58:01                | 642                       | 650                     | 0.5                                 |
| HLA-B*35:01                | 511                       | 519                     | 0.5                                 |
| HLA-A*30:02                | 661                       | 670                     | 0.53                                |
| HLA-A*33:01                | 560                       | 569                     | 0.53                                |
| HLA-A*31:01                | 561                       | 569                     | 0.55                                |
| HLA-A*23:01                | 578                       | 586                     | 0.56                                |
| HLA-A*68:02                | 580                       | 589                     | 0.56                                |
| HLA-B*51:01                | 517                       | 525                     | 0.6                                 |
| HLA-A*02:03                | 650                       | 658                     | 0.66                                |
| HLA-A*02:06                | 644                       | 653                     | 0.67                                |
| HLA-B*57:01                | 642                       | 650                     | 0.68                                |
| HLA-A*11:01                | 591                       | 600                     | 0.69                                |

|             |     |     |      |
|-------------|-----|-----|------|
| HLA-B*51:01 | 511 | 519 | 0.7  |
| HLA-B*15:01 | 571 | 579 | 0.7  |
| HLA-A*68:02 | 628 | 636 | 0.7  |
| HLA-A*02:03 | 580 | 589 | 0.72 |
| HLA-A*02:03 | 662 | 671 | 0.73 |
| HLA-A*03:01 | 560 | 569 | 0.74 |
| HLA-A*01:01 | 661 | 670 | 0.8  |
| HLA-B*35:01 | 567 | 575 | 0.8  |
| HLA-A*68:02 | 582 | 591 | 0.83 |
| HLA-A*26:01 | 572 | 580 | 0.84 |
| HLA-A*24:02 | 578 | 586 | 0.9  |
| HLA-A*68:02 | 654 | 662 | 0.9  |
| HLA-B*07:02 | 567 | 575 | 0.92 |
| HLA-A*02:06 | 656 | 664 | 0.95 |
| HLA-A*68:02 | 654 | 663 | 0.97 |

a—The choice of alleles was based on Human frequently occurring alleles and on the reference set of alleles recommended by Immune Epitope Data Base (IEDB). b—Position of the immunogenic epitope on BclA3 amino acid sequence. c - Epitopes with Percentile Rank under 1 are considered highly immunogenic by default according to prediction methods used recommended by IEDB. It was found 63 immunogenic peptides with Percentile Rank under 1 on the C—terminal domain of BclA3.

**Table S2.** Highly immunogenic peptides for MHC-I molecules on the N-terminal domain of BclA3.

| Allele <sup>a</sup> | Start <sup>b</sup> | End <sup>b</sup> | Percentile Rank <sup>c</sup> |
|---------------------|--------------------|------------------|------------------------------|
| HLA-B*07:02         | 53                 | 62               | 0.19                         |
| HLA-B*07:02         | 50                 | 58               | 0.2                          |
| HLA-B*07:02         | 53                 | 61               | 0.2                          |
| HLA-B*07:02         | 108                | 117              | 0.51                         |
| HLA-B*07:02         | 500                | 509              | 0.51                         |
| HLA-B*07:02         | 50                 | 59               | 0.52                         |
| HLA-B*07:02         | 62                 | 71               | 0.52                         |
| HLA-B*07:02         | 175                | 184              | 0.53                         |
| HLA-B*07:02         | 363                | 372              | 0.56                         |
| HLA-B*07:02         | 125                | 133              | 0.8                          |
| HLA-B*07:02         | 128                | 136              | 0.8                          |
| HLA-B*07:02         | 143                | 151              | 0.8                          |
| HLA-B*07:02         | 158                | 166              | 0.8                          |
| HLA-B*07:02         | 172                | 180              | 0.8                          |
| HLA-B*07:02         | 218                | 226              | 0.8                          |
| HLA-B*07:02         | 236                | 244              | 0.8                          |
| HLA-B*07:02         | 251                | 259              | 0.8                          |
| HLA-B*07:02         | 265                | 273              | 0.8                          |
| HLA-B*07:02         | 285                | 293              | 0.8                          |
| HLA-B*07:02         | 345                | 353              | 0.8                          |
| HLA-B*07:02         | 360                | 368              | 0.8                          |
| HLA-B*07:02         | 392                | 400              | 0.8                          |
| HLA-B*07:02         | 407                | 415              | 0.8                          |
| HLA-B*07:02         | 440                | 448              | 0.8                          |
| HLA-B*07:02         | 488                | 496              | 0.8                          |
| HLA-B*07:02         | 59                 | 67               | 0.9                          |
| HLA-B*07:02         | 75                 | 83               | 0.9                          |
| HLA-B*07:02         | 78                 | 86               | 0.9                          |
| HLA-B*07:02         | 122                | 130              | 0.9                          |

|             |     |     |     |
|-------------|-----|-----|-----|
| HLA-B*07:02 | 425 | 433 | 0.9 |
| HLA-B*07:02 | 458 | 466 | 0.9 |

a—The choice of alleles was based on Human frequently occurring alleles and on the reference set of alleles recommended by Immune Epitope Data Base (IEDB). b—Position of the immunogenic epitope on BclA3 amino acid sequence. c—Epitopes with Percentile Rank under 1 are considered highly immunogenic by default according to prediction methods used recommended by IEDB. It was found 30 immunogenic peptides with Percentile Rank under 1 on the N- terminal domain of BclA3.

**Table S3.** Highly immunogenic peptides for MHC-II molecules on the C-terminal domain of BclA3.

| Allele <sup>a</sup>       | Start <sup>b</sup> | End <sup>b</sup> | Percentile Rank <sup>c</sup> |
|---------------------------|--------------------|------------------|------------------------------|
| HLA-DRB1*09:01            | 603                | 617              | 0.01                         |
| HLA-DRB1*09:01            | 604                | 618              | 0.01                         |
| HLA-DRB1*09:01            | 605                | 619              | 0.01                         |
| HLA-DRB1*09:01            | 606                | 620              | 0.01                         |
| HLA-DRB1*09:01            | 607                | 621              | 0.01                         |
| HLA-DPA1*01:03/DPB1*02:01 | 639                | 653              | 0.01                         |
| HLA-DPA1*01:03/DPB1*02:01 | 640                | 654              | 0.01                         |
| HLA-DPA1*01:03/DPB1*02:01 | 641                | 655              | 0.01                         |
| HLA-DPA1*01:03/DPB1*02:01 | 642                | 656              | 0.01                         |
| HLA-DPA1*01:03/DPB1*02:01 | 643                | 657              | 0.01                         |
| HLA-DRB1*07:01            | 574                | 588              | 0.01                         |
| HLA-DRB1*07:01            | 575                | 589              | 0.01                         |
| HLA-DRB1*07:01            | 576                | 590              | 0.01                         |
| HLA-DRB1*07:01            | 577                | 591              | 0.01                         |
| HLA-DRB1*07:01            | 578                | 592              | 0.01                         |
| HLA-DPA1*01/DPB1*04:01    | 643                | 657              | 0.01                         |
| HLA-DRB1*07:01            | 579                | 593              | 0.03                         |
| HLA-DPA1*01/DPB1*04:01    | 644                | 658              | 0.03                         |
| HLA-DPA1*01/DPB1*04:01    | 645                | 659              | 0.04                         |
| HLA-DPA1*01:03/DPB1*02:01 | 644                | 658              | 0.06                         |
| HLA-DRB1*01:01            | 606                | 620              | 0.09                         |
| HLA-DRB1*09:01            | 532                | 546              | 0.1                          |
| HLA-DRB1*09:01            | 533                | 547              | 0.1                          |
| HLA-DRB1*09:01            | 534                | 548              | 0.1                          |
| HLA-DRB1*09:01            | 535                | 549              | 0.1                          |
| HLA-DRB1*09:01            | 574                | 588              | 0.12                         |
| HLA-DRB1*09:01            | 608                | 622              | 0.13                         |
| HLA-DRB1*09:01            | 609                | 623              | 0.13                         |
| HLA-DRB1*09:01            | 575                | 589              | 0.16                         |
| HLA-DRB1*09:01            | 576                | 590              | 0.19                         |
| HLA-DRB1*01:01            | 607                | 621              | 0.19                         |
| HLA-DRB1*09:01            | 510                | 524              | 0.23                         |
| HLA-DPA1*01:03/DPB1*02:01 | 575                | 589              | 0.23                         |
| HLA-DPA1*01:03/DPB1*02:01 | 574                | 588              | 0.24                         |
| HLA-DPA1*01:03/DPB1*02:01 | 576                | 590              | 0.24                         |
| HLA-DPA1*01:03/DPB1*02:01 | 577                | 591              | 0.24                         |
| HLA-DRB1*09:01            | 509                | 523              | 0.28                         |
| HLA-DRB1*01:01            | 605                | 619              | 0.32                         |
| HLA-DRB1*01:01            | 608                | 622              | 0.32                         |
| HLA-DPA1*01:03/DPB1*02:01 | 578                | 592              | 0.34                         |
| HLA-DRB1*09:01            | 511                | 525              | 0.38                         |
| HLA-DRB1*09:01            | 508                | 522              | 0.44                         |

|                           |     |     |      |
|---------------------------|-----|-----|------|
| HLA-DRB1*09:01            | 573 | 587 | 0.45 |
| HLA-DRB1*09:01            | 577 | 591 | 0.47 |
| HLA-DRB1*04:01            | 646 | 660 | 0.48 |
| HLA-DRB1*04:01            | 647 | 661 | 0.48 |
| HLA-DRB1*04:01            | 648 | 662 | 0.48 |
| HLA-DRB1*04:01            | 649 | 663 | 0.48 |
| HLA-DRB1*08:02            | 648 | 662 | 0.49 |
| HLA-DRB1*08:02            | 571 | 585 | 0.5  |
| HLA-DRB1*04:01            | 573 | 587 | 0.52 |
| HLA-DRB1*11:01            | 644 | 658 | 0.55 |
| HLA-DRB1*11:01            | 645 | 659 | 0.55 |
| HLA-DRB1*11:01            | 646 | 660 | 0.55 |
| HLA-DRB1*11:01            | 647 | 661 | 0.55 |
| HLA-DRB1*11:01            | 648 | 662 | 0.55 |
| HLA-DRB1*11:01            | 649 | 663 | 0.55 |
| HLA-DRB1*11:01            | 650 | 664 | 0.55 |
| HLA-DRB1*08:02            | 649 | 663 | 0.57 |
| HLA-DRB1*04:01            | 650 | 664 | 0.57 |
| HLA-DQA1*01:02/DQB1*06:02 | 634 | 648 | 0.6  |
| HLA-DRB1*08:02            | 570 | 584 | 0.61 |
| HLA-DRB1*04:01            | 574 | 588 | 0.67 |
| HLA-DRB1*08:02            | 647 | 661 | 0.69 |
| HLA-DRB1*08:02            | 646 | 660 | 0.7  |
| HLA-DRB1*09:01            | 507 | 521 | 0.71 |
| HLA-DRB1*08:02            | 572 | 586 | 0.71 |
| HLA-DRB1*01:01            | 647 | 661 | 0.71 |
| HLA-DQA1*01:02/DQB1*06:02 | 633 | 647 | 0.73 |
| HLA-DRB1*08:02            | 645 | 659 | 0.73 |
| HLA-DRB1*08:02            | 660 | 674 | 0.74 |
| HLA-DRB1*04:05            | 647 | 661 | 0.75 |
| HLA-DRB1*04:05            | 648 | 662 | 0.76 |
| HLA-DPA1*02:01/DPB1*14:01 | 575 | 589 | 0.76 |
| HLA-DRB1*04:05            | 645 | 659 | 0.79 |
| HLA-DRB1*04:05            | 646 | 660 | 0.8  |
| HLA-DRB1*04:05            | 644 | 658 | 0.81 |
| HLA-DRB1*09:01            | 578 | 592 | 0.82 |
| HLA-DQA1*01:02/DQB1*06:02 | 635 | 649 | 0.82 |
| HLA-DRB1*04:01            | 575 | 589 | 0.85 |
| HLA-DRB1*04:01            | 644 | 658 | 0.87 |
| HLA-DRB1*04:01            | 645 | 659 | 0.87 |
| HLA-DRB1*01:01            | 650 | 664 | 0.88 |
| HLA-DRB1*04:01            | 596 | 610 | 0.88 |
| HLA-DRB1*04:01            | 595 | 609 | 0.89 |
| HLA-DPA1*02:01/DPB1*14:01 | 576 | 590 | 0.89 |
| HLA-DRB1*04:01            | 594 | 608 | 0.9  |
| HLA-DRB1*09:01            | 572 | 586 | 0.93 |
| HLA-DRB1*08:02            | 606 | 620 | 0.95 |
| HLA-DRB1*01:01            | 603 | 617 | 0.96 |
| HLA-DRB1*01:01            | 604 | 618 | 0.96 |
| HLA-DRB1*04:01            | 597 | 611 | 0.97 |

a—The choice of alleles was based on Human frequently occurring alleles and on the reference set of alleles recommended by Immune Epitope Data Base (IEDB). b—Position of the immunogenic epitope on BclA3 amino

acid sequence. c—Epitopes with Percentile Rank under 1 are considered highly immunogenic by default according to prediction methods used recommended by IEDB. It was found 91 immunogenic peptides with Percentile Rank under 1 on the C-terminal domain of BclA3. N-terminal domain and central region of BclA3 have not displayed peptides with Percentile Rank under 1 for MHC-II.
